# Supplementary material for: The sliding clamp tethers the endonuclease domain of MutL to DNA
Source: PubMed Central journal article supplement — Nucleic Acids Res. 2015 Sep 17;43(22):10746–59. doi: 10.1093/nar/gkv918 (PMC4678855; doi:10.1093/nar/gkv918), 2015-09-17
Supplement: supp_gkv918_nar-01097-m-2015-File010.pdf [file supp_gkv918_nar-01097-m-2015-File010.pdf]

## **The sliding clamp tethers the endonuclease domain of MutL to DNA**

Monica C. Pillon<sup>1</sup>, Vignesh M.P. Babu<sup>2,3</sup>, Justin R. Randall<sup>5</sup>, Jiudou Cai<sup>1</sup>,  
Lyle A. Simmons<sup>5</sup>, Mark D. Sutton<sup>2,3,4</sup>, Alba Guarné<sup>1</sup>

**The supplementary material contains three tables, eight figures and two movies:**

Supplementary Table 1: Concentration-dependency of I0, Rg, and Dmax

Supplementary Table 2: SAXS data-collection and scattering-derived parameters

Supplementary Table 3: List of *Bacillus subtilis* strains

Supplementary Figure 1: Biochemical characterization of the MutL<sup>CTD</sup> and  $\beta$  proteins

Supplementary Figure 2: Biochemical characterization of the MutL<sup>CTD</sup>- $\beta$  complexes

Supplementary Figure 3: Guinier approximation for SAXS scattering curves

Supplementary Figure 4: SAXS characterization of *E. coli* MutL<sup>CTD</sup> and  $\beta$ -clamp

Supplementary Figure 5: SAXS characterization of *B. subtilis* MutL<sup>CTD</sup> and  $\beta$ -clamp

Supplementary Figure 6: *E. coli* MutL interacts with  $\beta$  in a nucleotide-independent manner

Supplementary Figure 7: The  $\beta$  clamp enhances the MutL-dependent stimulation of UvrD

Supplementary Figure 8: Interaction between *B. subtilis* MutL<sup>CTD</sup> and  $\beta$ -clamp

Supplementary Figure 9: SASREF modeling of the *B. subtilis* MutL<sup>CTD</sup>- $\beta$  complex

Supplementary Movie 1: SAXS bead models of the *E. coli* MutL<sup>CTD</sup>- $\beta$  complexes

Supplementary Movie 2: SAXS bead model of the *B. subtilis* MutL<sup>CTD</sup>- $\beta$  complex

**Supplementary Table 1: Concentration-dependency of I0, Rg, and Dmax.**

| Protein                     | Concentration ( $\mu\text{M}$ ) | I0/conc | Rg ( $\text{\AA}$ )** | D <sub>max</sub> ( $\text{\AA}$ ) |
|-----------------------------|---------------------------------|---------|-----------------------|-----------------------------------|
| e $\beta$                   | 186                             | 0.018   | 32.3                  | 83                                |
|                             | 93                              | 0.019   | 33.1                  | 90                                |
|                             | 47                              | 0.018   | 32.9                  | 90                                |
| eL <sup>C</sup>             | 364                             | 0.004   | 31.3                  | 100                               |
|                             | 182                             | 0.004   | 31.9                  | 100                               |
|                             | 91                              | 0.004   | 31.9                  | 102                               |
| eL <sup>C</sup> -e $\beta$  | 123                             | 0.029   | 34.6                  | 100                               |
|                             | 61                              | 0.029   | 35.5                  | 102                               |
|                             | 38.5                            | 0.033   | 35.3                  | 101                               |
|                             | 19.5                            | 0.030   | 36.0                  | 104                               |
|                             | 9.5                             | 0.031   | 35.6                  | 103                               |
| b $\beta$                   | 73                              | 0.024*  | 37.4                  | 104                               |
|                             | 44                              | 0.023*  | 37.1                  | 105                               |
|                             | 32                              | 0.016   | 36.1                  | 100                               |
|                             | 27                              | 0.019   | 36.7                  | 103                               |
| bL <sup>Cl</sup>            | 218                             | 0.003   | 33.6                  | 112                               |
|                             | 165                             | 0.003   | 33.7                  | 112                               |
|                             | 88                              | 0.003   | 33.1                  | 110                               |
| bL <sup>Cl</sup> -b $\beta$ | 37                              | 0.080   | 42.1                  | 139                               |
|                             | 30                              | 0.080   | 41.7                  | 140                               |
|                             | 22                              | 0.080   | 41.7                  | 138                               |

\* Samples were collected following a filament change resulting in a more intense beam

\*\* Rg determined using the GNOM program from the ATSAS 2.6.0 package

**Supplementary Table 2: SAXS data-collection and scattering-derived parameters**

|                                                | e $\beta$                       | eMutL <sup>CTD</sup>            | b $\beta$      | bMutL <sup>CTDI</sup> |
|------------------------------------------------|---------------------------------|---------------------------------|----------------|-----------------------|
| <b>Data-collection parameters</b>              |                                 |                                 |                |                       |
| Exposure time (min)                            | 60                              | 60                              | 60             | 120                   |
| Concentration ( $\mu$ M)                       | 93                              | 91/364*                         | 32             | 165                   |
| <b>Structural parameters</b>                   |                                 |                                 |                |                       |
| $I_0$ (cm <sup>-1</sup> ) [from Guinier]       | 1.7 $\pm$ 0.0                   | 0.4 $\pm$ 0.0                   | 0.5 $\pm$ 0.0  | 0.6 $\pm$ 0.0         |
| $R_g$ (Å) [from Guinier]                       | 33.4 $\pm$ 0.2                  | 30.8 $\pm$ 0.9                  | 37.9 $\pm$ 0.5 | 32.1 $\pm$ 0.4        |
| $I_0$ (cm <sup>-1</sup> ) [from P(r)]          | 1.7 $\pm$ 0.0                   | 0.4 $\pm$ 0.0                   | 0.5 $\pm$ 0.0  | 0.6 $\pm$ 0.0         |
| $R_g$ (Å) [from P(r)]                          | 32.9 $\pm$ 0.1                  | 33.0 $\pm$ 0.2                  | 36.1 $\pm$ 0.1 | 33.7 $\pm$ 0.3        |
| $D_{max}$ (Å)                                  | 90                              | 107                             | 100            | 112                   |
| Experimental MW [from $Q_R$ ] <sup>&amp;</sup> | 85,855 Da                       | 43,529 Da                       | 102,663 Da     | 45,390 Da             |
| Calculated MW                                  | 81,263 Da                       | 41,108 Da                       | 90,894 Da      | 45,500 Da             |
| <i>Ab initio</i> analysis                      | <i>DAMMIF/</i><br><i>DAMMIN</i> | <i>DAMMIF/</i><br><i>DAMMIN</i> | <i>DAMMIN</i>  | <i>DAMMIF</i>         |
| $\chi^2$ of <i>ab initio</i> models            | 1.1                             | 1.0-1.1                         | 1.2            | 0.9                   |
| $\chi^2$ (Crysol)                              | 1.3                             | 1.1                             | 1.5            | 1.0                   |
| PDB                                            | 1MMI                            | 1X9Z                            | 4RT6           | 3KDK                  |

\*Scattering intensities at low and high scattering angles from the lowest and highest concentrated samples, respectively, were merged using the automerger function from the Primus program in the ATSAS 2.6.0 package.

<sup>&</sup>MW determined using ScÅtter (Rambo and Tainer, 2013).

**Supplementary Table 3: List of *Bacillus subtilis* strains**

| <b>Strain</b> | <b>Characteristics</b>                                                          | <b>Source</b>                 |
|---------------|---------------------------------------------------------------------------------|-------------------------------|
| JRR27         | PY79 (SP $\beta$ <sup>0</sup> )                                                 | Simmons et al. 2008 Mol. Cell |
| PB112         | $\Delta$ <i>mutL</i>                                                            | this study                    |
| JRR20         | <i>mutL</i> (C69S,C424S,E485C,C531S)                                            | this study                    |
| JRR21         | <i>dnaN</i> (S379,C380) ( <i>cat</i> )                                          | this study                    |
| JRR28         | <i>mutL</i> (C69S,C424S,E485C,C531S),<br><i>dnaN</i> (S379,C380) ( <i>cat</i> ) | this study                    |

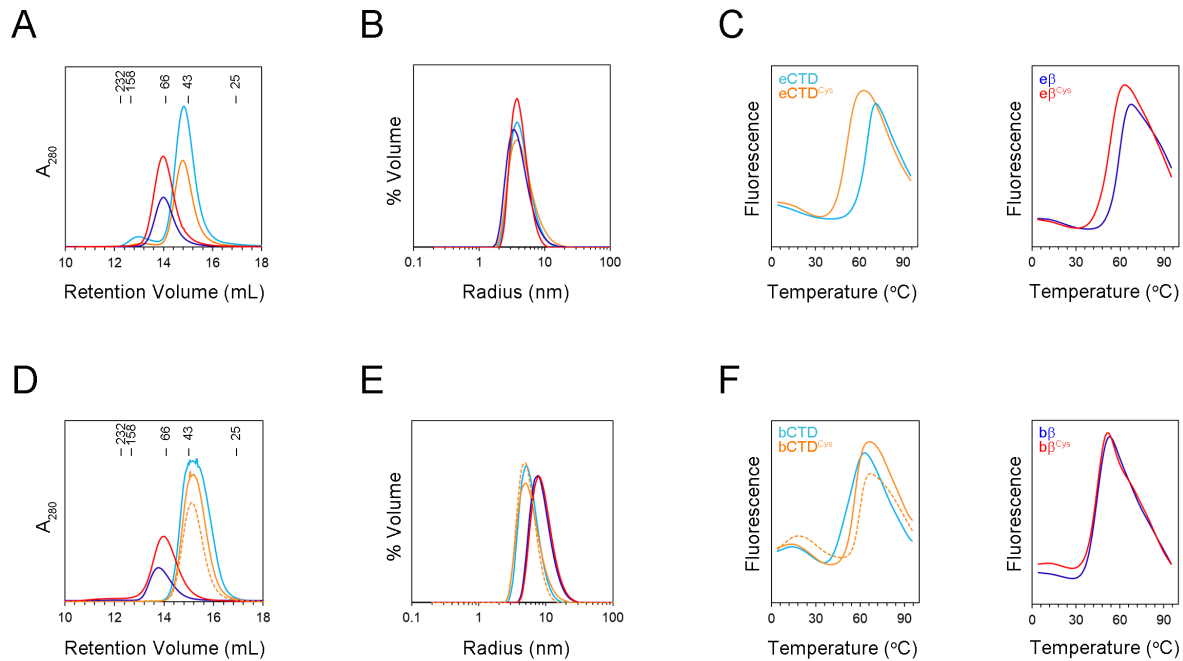

**Supplementary Figure 1: Biochemical characterization of the MutL<sup>CTD</sup> and β proteins.** (A) Size exclusion chromatography profiles of *E. coli* MutL<sup>CTD</sup> and its Cys-variant (light blue and orange), and *E. coli* β and its Cys-variant (dark blue and red). Elution volumes of molecular weight markers (kDa) are indicated. (B) Dynamic light scattering particle size distributions of *E. coli* MutL<sup>CTD</sup>, *E. coli* β and their Cys-variants shown as volume distributions and coloured as in (A). (C) Thermal denaturation curves of *E. coli* MutL<sup>CTD</sup> (left) and β (right) and their Cys-variants measured by differential scanning fluorimetry. (D) Size exclusion chromatography profiles of *B. subtilis* MutL<sup>CTD</sup> (light blue) and its active (solid orange line) and inactive Cys-variants (dash orange line), and *B. subtilis* β and its Cys-variant (dark blue and red). (E) Dynamic light scattering particle size distributions of *B. subtilis* MutL<sup>CTD</sup>, and *B. subtilis* β and their Cys-variants shown as volume distributions and coloured as in (D). (F) Thermal denaturation curves of *B. subtilis* MutL<sup>CTD</sup> (left) and β (right) and their Cys-variants measured by differential scanning fluorimetry.

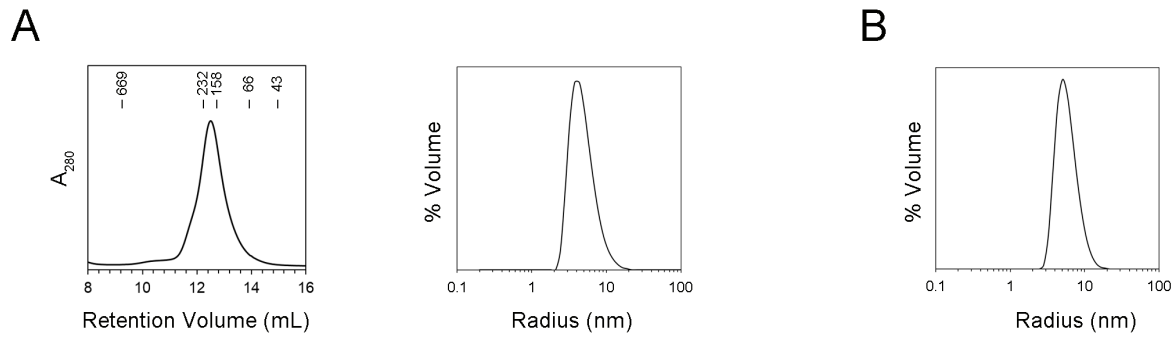

**Supplementary Figure 2: Biochemical characterization of the MutL<sup>CTD</sup>-β complexes. (A)** Size exclusion chromatography profiles (left) and dynamic light scattering particle size distributions (right) of the *E. coli* MutL<sup>CTD</sup>-β complex at ‘Day 2’. **(B)** Dynamic light scattering particle size distributions of the *B. subtilis* MutL<sup>CTD</sup>-β complex.

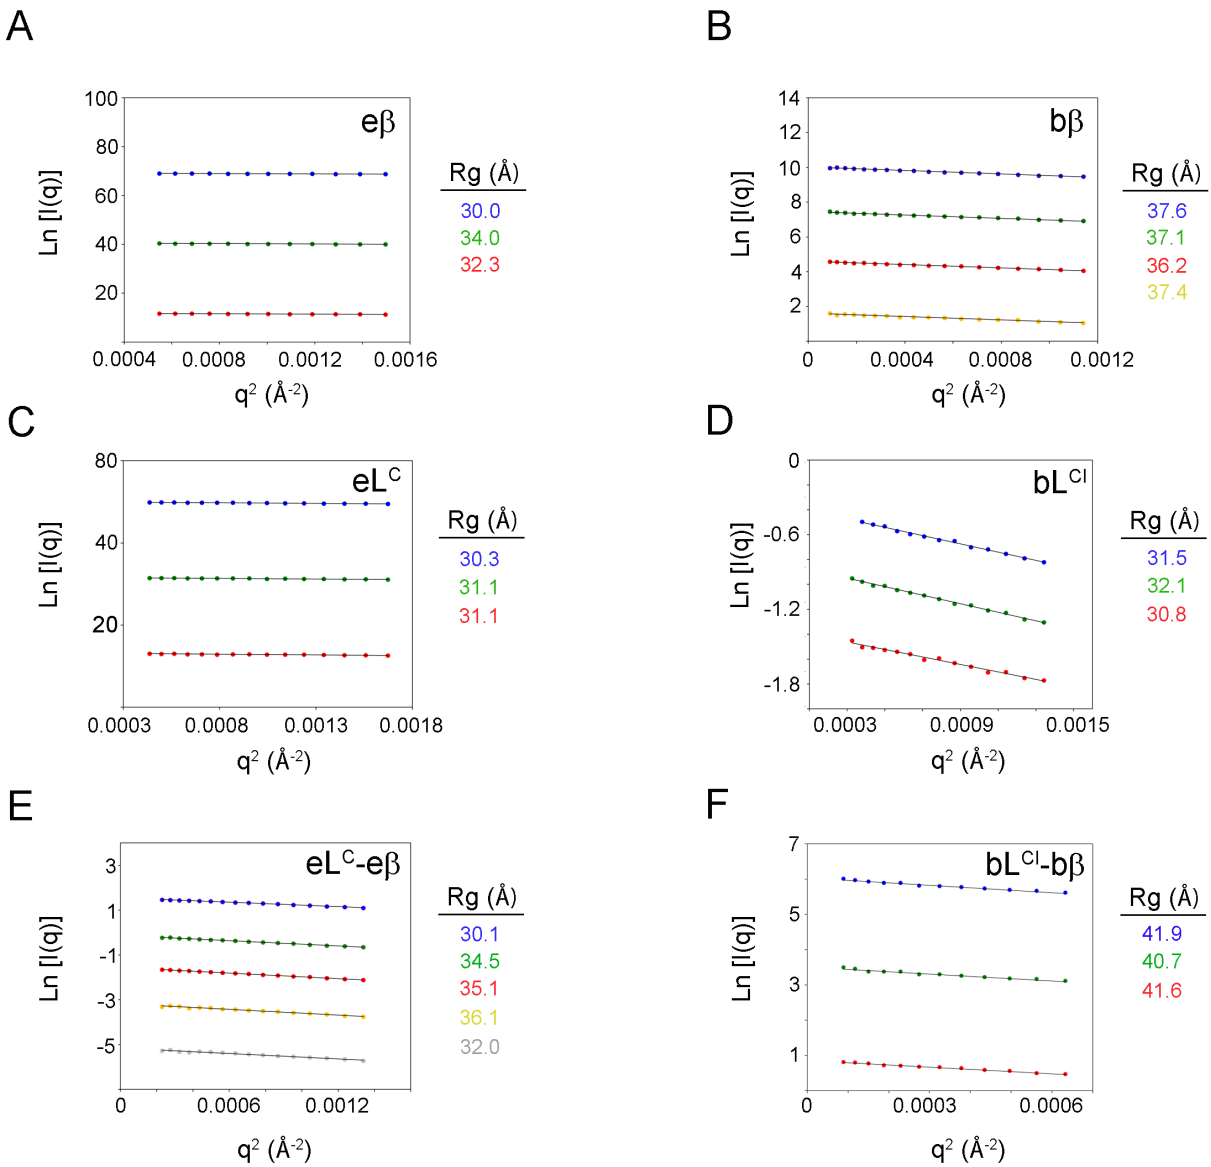

**Supplementary Figure 3: Guinier approximation for SAXS scattering curves.** Guinier plots for a concentration series (see **Supplementary Table 1**) of eβ (**A**), bβ (**B**), eMutL<sup>CTD</sup> (**C**), bMutL<sup>CTDI</sup> (**D**), eMutL<sup>CTD</sup>-eβ (**E**) and bMutL<sup>CTDI</sup>-bβ (**F**) are shown with linear fit (black line). The radius of gyration (Rg) determined in reciprocal space for each concentration is indicated next to each panel. The linearity of the Guinier plots indicates the absence of interparticle interactions.

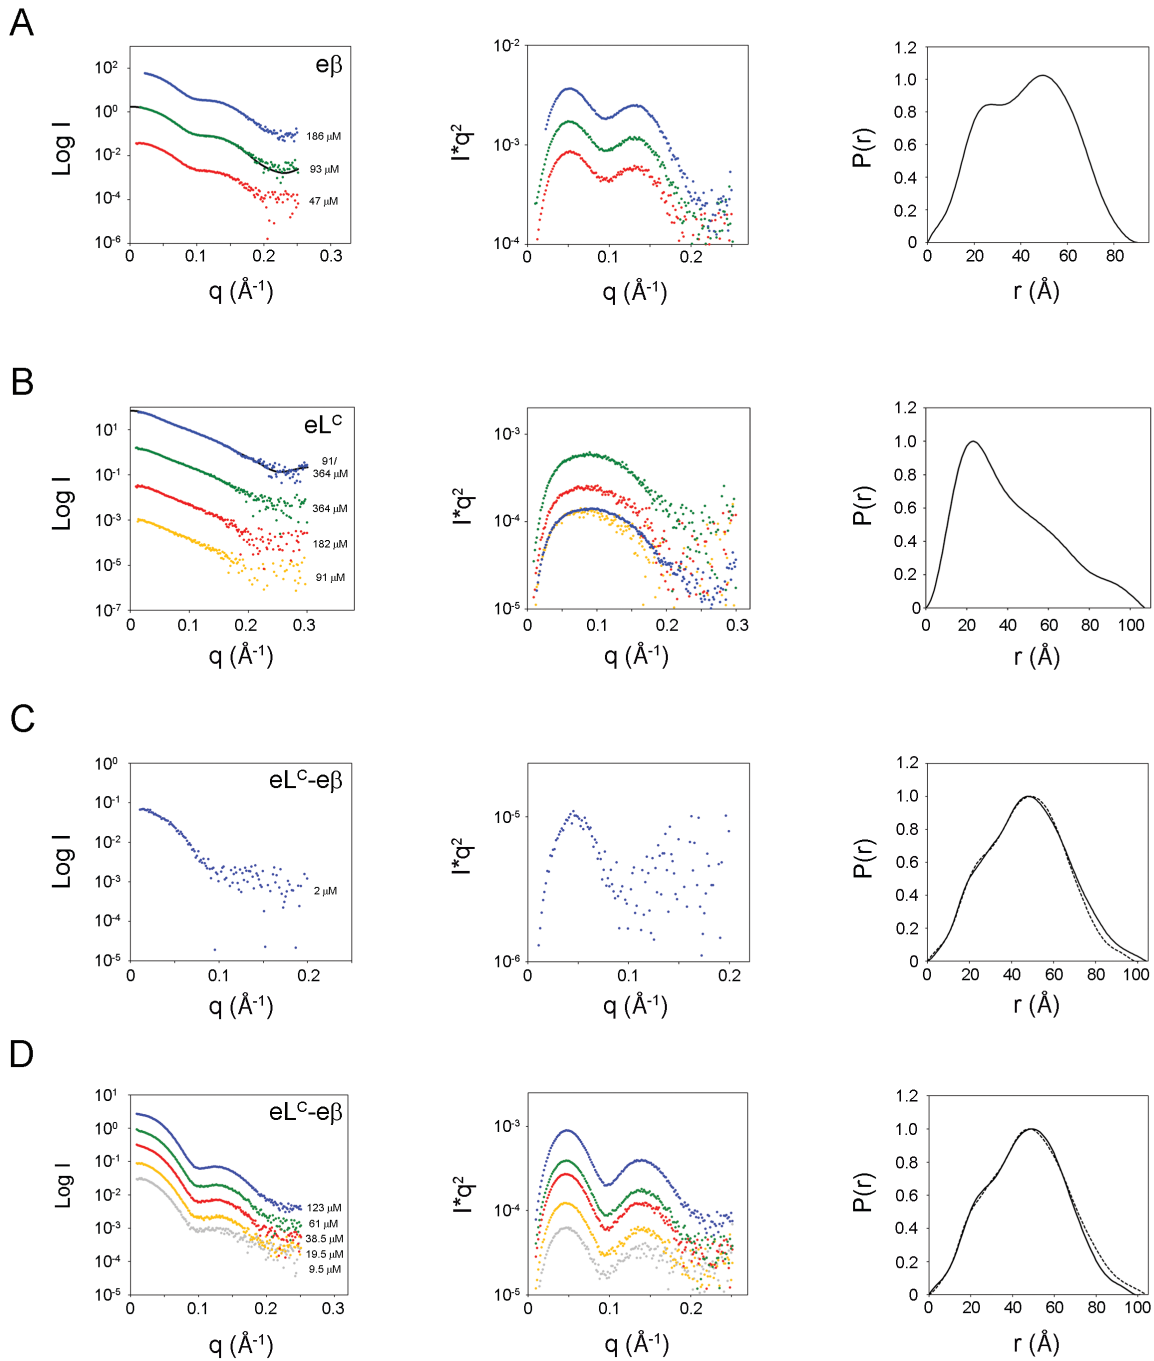

**Supplementary Figure 4: SAXS characterization of *E. coli* MutL<sup>CTD</sup> and  $\beta$ -clamp.** Solution scattering (left), Kratky plot (centre) and pair-distance distribution functions (right) of  $e\beta$  (A), eMutL<sup>CTD</sup> (B), eMutL<sup>CTD</sup>- $e\beta$  at ‘Day 1’ (C), and eMutL<sup>CTD</sup>- $e\beta$  at ‘Day2’ (D). Theoretical solution scattering calculated with CRYSOLE (63) from the atomic structures of  $\beta$  (PDB: 1MMI) and MutL-CTD (PDB: 1X9Z) are shown as solid black lines. The pair-distance distribution functions of ‘Day 2’ and ‘Day 1’ are shown as dotted lines in panels (C) and (D) for comparison.



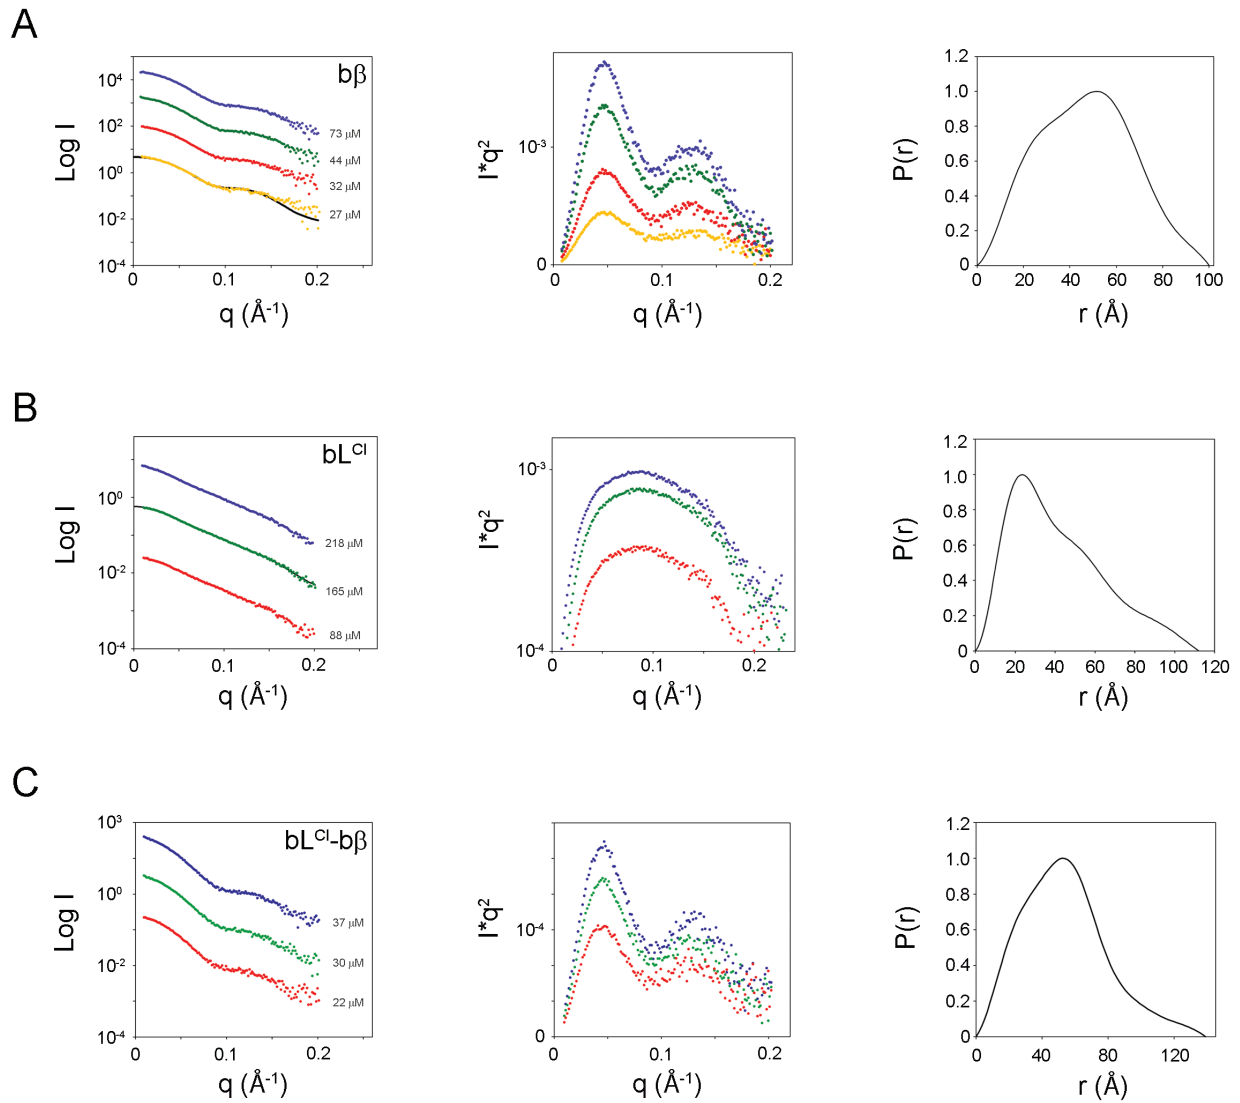

**Supplementary Figure 5: SAXS characterization of *B. subtilis* MutL<sup>CTD</sup> and  $\beta$ -clamp.**

Solution scattering (left), Kratky plots (center) and pair-distance distribution functions (right) of  $b\beta$  (A),  $b\text{MutL}^{\text{CTDI}}$  (B), and  $b\text{MutL}^{\text{CTDI}}\text{-}b\beta$  at ‘Day 2’ (C). Theoretical solution scattering (black line) calculated with CRY SOL (63) from the atomic structures of *B. subtilis*  $\beta$ -clamp (PDB ID 4RT6) and the C-terminal domain of *B. subtilis* MutL (PDB ID 3KDK) are shown as solid black lines with the scattering curves.

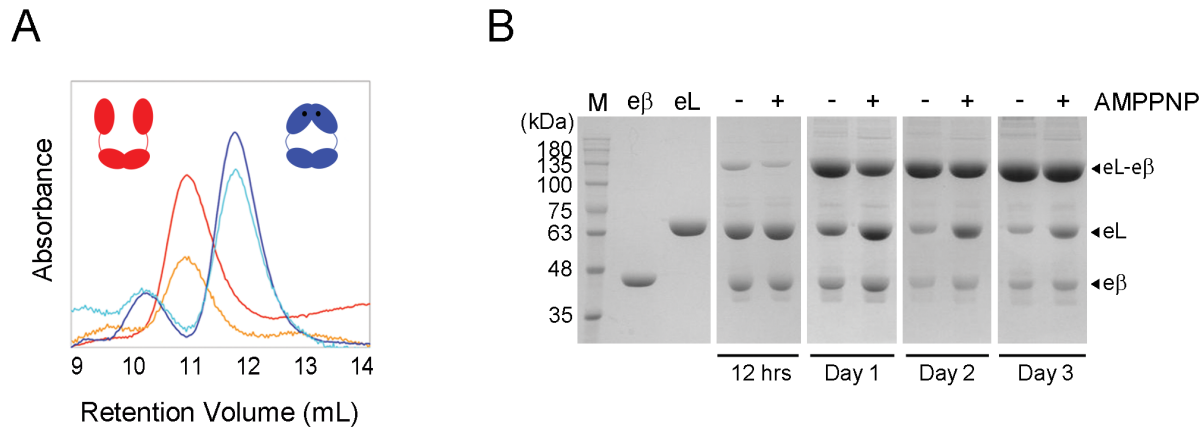

**Supplementary Figure 6: *E. coli* MutL interacts with  $\beta$  in a nucleotide-independent manner.** (A) Size exclusion chromatography profile of MutL in the absence (red/orange) or presence (blue/cyan) of AMPPNP. The conformational change of MutL and nucleotide binding are monitored by comparing the absorbances at 280 nm (red/blue) and 260 nm (orange/cyan). (B) Purified *E. coli* MutL (eL) crosslinked with equimolar amounts of *E. coli*  $\beta$  (e $\beta$ ) in the presence/absence of AMPPNP resolved on denaturing gels in the absence of  $\beta$ -mercaptoethanol.

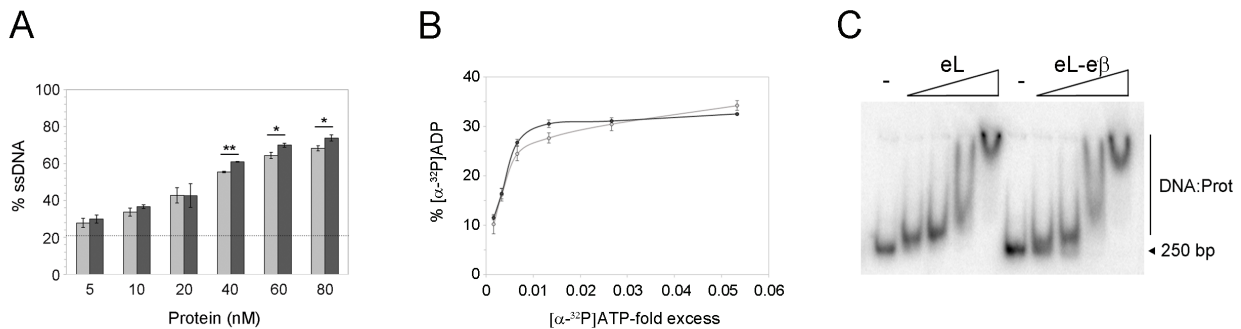

**Supplementary Figure 7: The  $\beta$  clamp enhances the MutL-dependent stimulation of UvrD.**

(A) UvrD helicase activity in the presence of eL (light grey) and eL-e $\beta$  (dark grey) on a 250 base-pair nicked DNA. The dotted line denotes the unwinding activity of UvrD in the absence of eL or eL-e $\beta$ . Error bars represent the standard deviation of three independent experiments. The p-value was calculated using a two-sample unequal variance t-test. \*,  $p < 0.013$  and \*\*,  $p < 1.4 \times 10^{-4}$ . (B) ATP hydrolysis activity of eL (grey line) and eL-e $\beta$  (black line). Error bars represent the standard deviation of three independent experiments. (C) DNA binding of eL and eL-e $\beta$  measured using a 250 base-pair DNA.

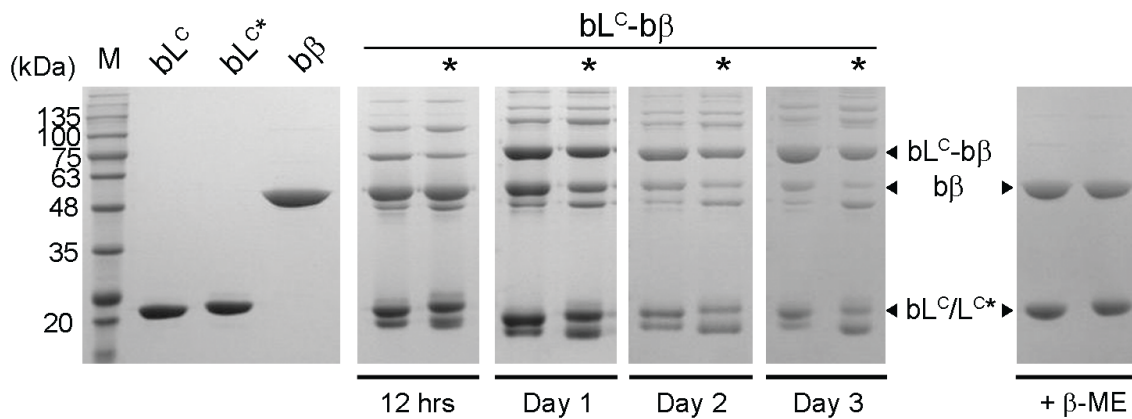

**Supplementary Figure 8: Interaction between *B. subtilis* MutL<sup>CTD</sup> and  $\beta$ .** *B. subtilis*  $\beta$  ( $\beta$ ), the active form of *B. subtilis* MutL<sup>CTD</sup> ( $bL^C$ ), and a variant of MutL<sup>CTD</sup> lacking the  $\beta$ -binding motif MutL<sup>CTD\*</sup> ( $bL^{C*}$ ) were purified and equimolar mixtures of either  $bL^C$ - $\beta$  or  $bL^{C*}$ - $\beta$  were incubated in the absence of reducing agent. Samples withdrawn from the reaction at the indicated time points were resolved on denaturing gels in the absence of  $\beta$ -mercaptoethanol ( $\beta$ -ME).

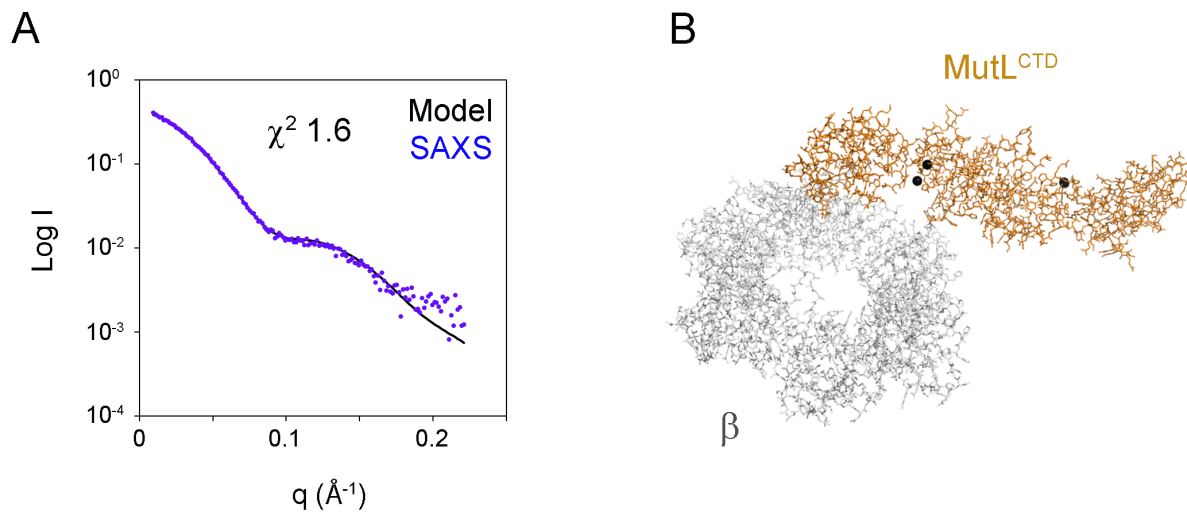

**Supplementary Figure 9: Quaternary structure modelling of  $bMutL^{CTD}$ - $\beta$ .** (A) SASREF fitting of the *B. subtilis* MutL<sup>CTD</sup> (PDB 3KDK; orange) is bound at the hydrophobic cleft of  $\beta$  (PDB 4TR6; grey). MutL<sup>CTD</sup> lies along the edge of the  $\beta$  ring which aligns the proximal MutL endonuclease site with the central cavity of  $\beta$ . Black spheres represent two zinc metals bound at the endonuclease active site of the MutL homodimer.
